# Supplementary figures and images for: Dose distribution and up‐titration patterns of metformin monotherapy in patients with type 2 diabetes
Source: PubMed Central journal article supplement — Endocrinol Diabetes Metab. 2019 Dec 17;3(1):e00107. doi: 10.1002/edm2.107 (PMC6947691; doi:10.1002/edm2.107), 2019-12-17

Figure S1. Treatment patterns in new users of metformin

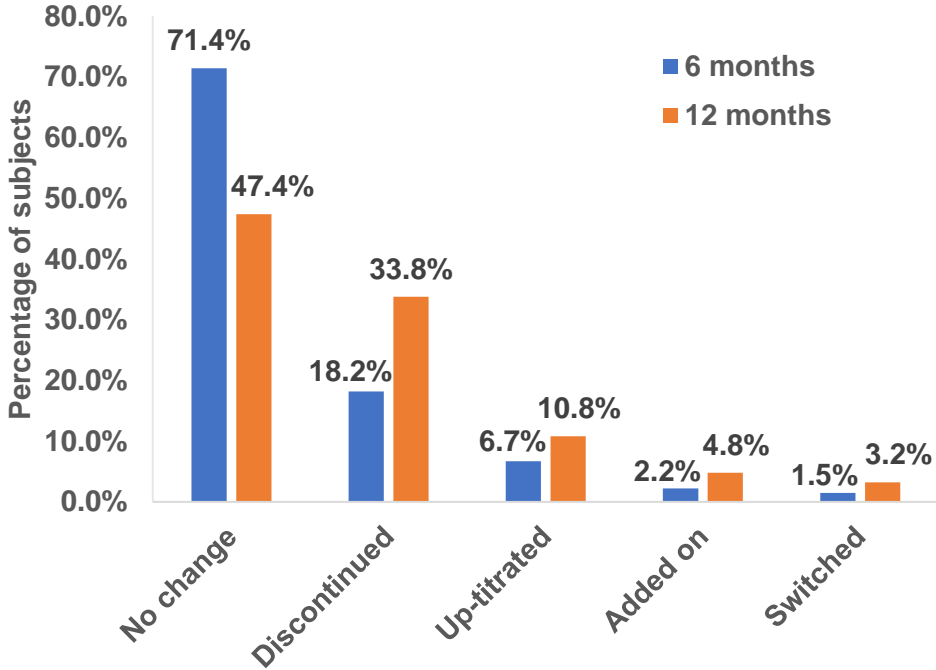

Supplement: EDM2-3-e00107-s001.pdf [file EDM2-3-e00107-s001.pdf]
